# Supplementary material for: MiR-96-5p alleviates inflammatory responses by targeting NAMPT and regulating the NF-κB pathway in neonatal sepsis
Source: Oxford University Press journal article supplement (doi:10.1042/bsr20201267), 2020-06-17
Supplement: bsr-2020-1267_supp.pdf [file bsr-2020-1267_supp.pdf]

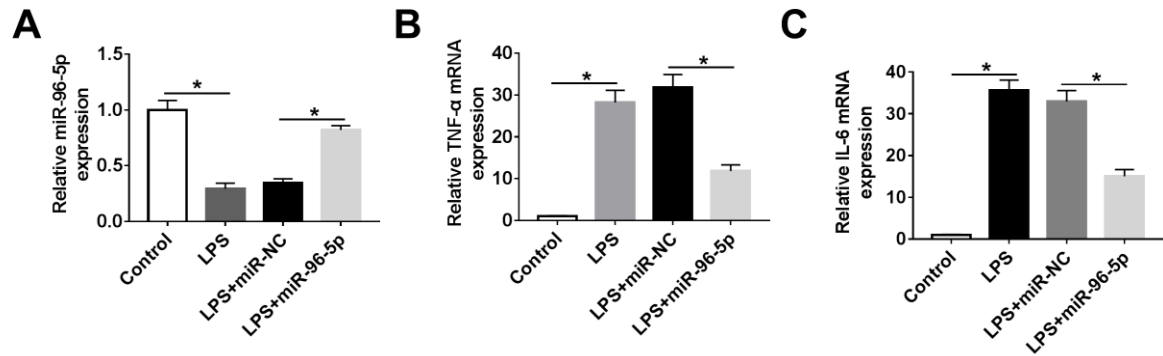

**Fig. S1 miR-96-5p inhibited inflammatory response in monocytes from neonatal sepsis patients' blood samples.** A-C, **monocytes were** treated with control, LPS, LPS + miR-NC or LPS + miR-96-5p mimic. **A**, The relative expression levels of miR-96-5p in cells were measured by qRT-PCR. **B and C**, the expression levels of TNF- $\alpha$  and IL-6 in cells were detected by qRT-PCR. \* $P < 0.05$ .

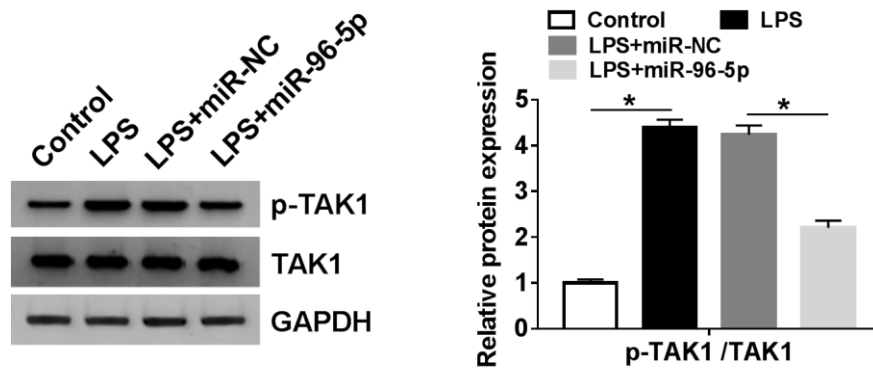

**Fig. S2 MiR-96-5p inhibited TAK1 expression in RAW264.7 cells stimulated with LPS.** The expression level of TAK1 in cells treated with LPS or LPS + miR-96-5p was detected by western blot. \* $P < 0.05$ .
